# Supplementary material
Source: publisher site journal article supplement (https://www.dovepress.com/article/554387)
Supplement: Supplementary file 1 [file 554387%20Revised%20Supplementary%20Tables.docx]

Supplementary Tables

**Table S1. *P*-values adjusted for multiple comparisons for the association between inflammatory indices and CVD in OSA patients**

| Characteristic | Model 1 | |  | Model 2 | |  | Model 3 | |
| --- | --- | --- | --- | --- | --- | --- | --- | --- |
| *P* value | *q* value |  | *P* value | *q* value |  | *P* value | *q* value |
| PLR | 0.046 | 0.061 |  | 0.149 | 0.164 |  | 0.249 | 0.285 |
| Q1 (≤99.16) | Ref. | Ref. |  | Ref. | Ref. |  | Ref. | Ref. |
| Q2 (99.16-125.46) | 0.532 | 0.532 |  | 0.929 | 0.929 |  | 0.834 | 0.834 |
| Q3 (125.46-162.23) | 0.240 | 0.265 |  | 0.150 | 0.160 |  | 0.263 | 0.281 |
| Q4 (>162.23) | 0.073 | 0.093 |  | 0.093 | 0.106 |  | 0.259 | 0.286 |
| NLR | <0.001 | 0.001 |  | 0.007 | 0.012 |  | 0.014 | 0.028 |
| Q1 (≤1.68) | Ref. | Ref. |  | Ref. | Ref. |  | Ref. | Ref. |
| Q2 (1.68-2.29) | 0.112 | 0.133 |  | 0.080 | 0.098 |  | 0.174 | 0.206 |
| Q3 (2.29-3.23) | <0.001 | 0.001 |  | 0.002 | 0.006 |  | 0.014 | 0.028 |
| Q4 (>3.23) | <0.001 | <0.001 |  | <0.001 | <0.001 |  | <0.001 | 0.002 |
| MLR | <0.001 | <0.001 |  | 0.005 | 0.011 |  | 0.013 | 0.028 |
| Q1 (≤0.17) | Ref. | Ref. |  | Ref. | Ref. |  | Ref. | Ref. |
| Q2 (0.17-0.22) | 0.001 | 0.002 |  | 0.005 | 0.011 |  | 0.011 | 0.025 |
| Q3 (0.22-0.30) | <0.001 | 0.001 |  | 0.005 | 0.011 |  | 0.020 | 0.032 |
| Q4 (>0.30) | <0.001 | <0.001 |  | 0.001 | 0.004 |  | 0.003 | 0.014 |
| NHR | 0.010 | 0.017 |  | 0.003 | 0.007 |  | 0.006 | 0.019 |
| Q1 (≤3.14) | Ref. | Ref. |  | Ref. | Ref. |  | Ref. | Ref. |
| Q2 (3.14-4.26) | 0.106 | 0.130 |  | 0.024 | 0.032 |  | 0.147 | 0.196 |
| Q3 (4.26-5.76) | <0.001 | <0.001 |  | <0.001 | <0.001 |  | <0.001 | <0.001 |
| Q4 (>5.76) | <0.001 | <0.001 |  | <0.001 | <0.001 |  | <0.001 | <0.001 |
| MHR | 0.021 | 0.029 |  | 0.007 | 0.012 |  | 0.009 | 0.024 |
| Q1 (≤0.30) | Ref. | Ref. |  | Ref. | Ref. |  | Ref. | Ref. |
| Q2 (0.30-0.41) | 0.151 | 0.173 |  | 0.081 | 0.096 |  | 0.150 | 0.192 |
| Q3 (0.41-0.56) | 0.018 | 0.026 |  | 0.005 | 0.011 |  | 0.008 | 0.023 |
| Q4 (>0.56) | 0.002 | 0.004 |  | <0.001 | 0.001 |  | 0.001 | 0.005 |
| SII | 0.006 | 0.011 |  | 0.011 | 0.017 |  | 0.019 | 0.034 |
| Q1 (≤350.75) | Ref. | Ref. |  | Ref. | Ref. |  | Ref. | Ref. |
| Q2 (350.75-504.13) | 0.274 | 0.292 |  | 0.051 | 0.065 |  | 0.161 | 0.198 |
| Q3 (504.13-750.03) | 0.003 | 0.006 |  | 0.001 | 0.004 |  | 0.019 | 0.034 |
| Q4 (>750.03) | <0.001 | <0.001 |  | <0.001 | <0.001 |  | <0.001 | 0.002 |
| SIRI | <0.001 | 0.001 |  | 0.005 | 0.011 |  | 0.009 | 0.024 |
| Q1 (≤0.60) | Ref. | Ref. |  | Ref. | Ref. |  | Ref. | Ref. |
| Q2 (0.60-0.89) | 0.016 | 0.024 |  | 0.015 | 0.022 |  | 0.078 | 0.109 |
| Q3 (0.89-1.43) | <0.001 | <0.001 |  | <0.001 | 0.001 |  | 0.004 | 0.014 |
| Q4 (>1.43) | <0.001 | <0.001 |  | <0.001 | <0.001 |  | <0.001 | 0.001 |
| AISI | 0.011 | 0.018 |  | 0.019 | 0.026 |  | 0.021 | 0.032 |
| Q1 (≤121.79) | Ref. | Ref. |  | Ref. | Ref. |  | Ref. | Ref. |
| Q2 (121.79-196.18) | 0.433 | 0.447 |  | 0.212 | 0.219 |  | 0.515 | 0.532 |
| Q3 (196.18-327.61) | 0.007 | 0.012 |  | 0.002 | 0.006 |  | 0.032 | 0.047 |
| Q4 (>327.61) | <0.001 | <0.001 |  | <0.001 | <0.001 |  | 0.003 | 0.014 |

Abbreviation: OR, odd ratio; CI, confidence interval; PLR, platelet-to-lymphocyte ratio; NLR, neutrophil-to-lymphocyte ratio; MLR, monocyte-to-lymphocyte ratio; NHR, ratio of neutrophil count to HDL level; MHR, ratio of monocyte count to HDL level; SII, platelet count multiplied by neutrophil-to-lymphocyte ratio; SIRI, monocyte count multiplied by neutrophil-to-lymphocyte ratio; AISI, neutrophil count multiplied by platelet count multiplied by monocyte-to-lymphocyte ratio.

Model 1: Unadjusted model.

Model 2: Adjusted for sex, age, BMI, smoking, and alcohol.

Model 3: Adjusted for sex, age, BMI, smoking and alcohol, hypertension, hyperlipemia, diabetes, and FLD.

Note: The *q*-value is the *P*-value after adjustment for multiple comparisons using the Benjamini-Hochberg procedure to control the False Discovery Rate. The significance threshold was set at *q* < 0.05.

**Table S2. *P*-values adjusted for multiple comparisons of ROC analysis of NLR, MLR, NHR, MHR, and SIRI in discriminating CVD in OSA patients**

| Characteristic | Model 1 | |  | Model 2 | | |  | | Model 3 | | |
| --- | --- | --- | --- | --- | --- | --- | --- | --- | --- | --- | --- |
| *P* value | *q* value |  | | *P* value | *q* value | |  | | *P* value | *q* value | |
| NLR | <0.001 | <0.001 |  | | <0.001 | <0.001 | |  | | <0.001 | <0.001 | |
| MLR | <0.001 | <0.001 |  | | <0.001 | <0.001 | |  | | <0.001 | <0.001 | |
| NHR | <0.001 | <0.001 |  | | <0.001 | <0.001 | |  | | <0.001 | <0.001 | |
| MHR | <0.001 | 0.001 |  | | <0.001 | <0.001 | |  | | <0.001 | <0.001 | |
| SIRI | <0.001 | <0.001 |  | | <0.001 | <0.001 | |  | | <0.001 | <0.001 | |

Abbreviation: AUC, area under the curve; CI, confidence interval; NLR, neutrophil-to-lymphocyte ratio; MLR, monocyte-to-lymphocyte ratio; NHR, ratio of neutrophil count to HDL level; MHR, ratio of monocyte count to HDL level; SIRI, monocyte count multiplied by neutrophil-to-lymphocyte ratio.

Model 1: Unadjusted model.

Model 2: Adjusted for sex, age, BMI, smoking, and alcohol.

Model 3: Adjusted for sex, age, BMI, smoking and alcohol, hypertension, hyperlipemia, diabetes, and FLD.

Note: The *q*-value is the *P*-value after adjustment for multiple comparisons using the Benjamini-Hochberg procedure to control the False Discovery Rate. The significance threshold was set at *q* < 0.05.

**Table S3. Tolerance values and variance inflation factors of covariates**

| Characteristic | PLR | |  | NLR | |  | MLR | |  | NHR | |  | MHR | |  | SII | |  | SIRI | |  | | AISI | |
| --- | --- | --- | --- | --- | --- | --- | --- | --- | --- | --- | --- | --- | --- | --- | --- | --- | --- | --- | --- | --- | --- | --- | --- | --- |
| TV | VIFs |  | TV | VIFs |  | VIFs | TV |  | VIFs | TV |  | TV | VIFs |  | TV | VIFs |  | TV | VIFs |  | TV | | VIFs |
| Inflammatory index | 0.975 | 1.026 |  | 0.973 | 1.028 |  | 1.028 | 0.954 |  | 1.048 | 0.941 |  | 0.928 | 1.078 |  | 0.992 | 1.008 |  | 0.981 | 1.019 |  | 0.988 | | 1.012 |
| Sex | 0.763 | 1.311 |  | 0.762 | 1.313 |  | 1.313 | 0.759 |  | 1.317 | 0.752 |  | 0.752 | 1.329 |  | 0.763 | 1.311 |  | 0.761 | 1.314 |  | 0.763 | | 1.311 |
| Age | 0.820 | 1.219 |  | 0.814 | 1.229 |  | 1.229 | 0.805 |  | 1.242 | 0.823 |  | 0.822 | 1.217 |  | 0.825 | 1.213 |  | 0.821 | 1.218 |  | 0.825 | | 1.212 |
| BMI | 0.902 | 1.109 |  | 0.902 | 1.109 |  | 1.109 | 0.897 |  | 1.114 | 0.893 |  | 0.883 | 1.133 |  | 0.903 | 1.108 |  | 0.896 | 1.115 |  | 0.898 | | 1.113 |
| Smoker | 0.676 | 1.479 |  | 0.677 | 1.478 |  | 1.478 | 0.677 |  | 1.477 | 0.676 |  | 0.675 | 1.481 |  | 0.677 | 1.477 |  | 0.677 | 1.477 |  | 0.677 | | 1.477 |
| Alcohol | 0.768 | 1.302 |  | 0.768 | 1.302 |  | 1.302 | 0.768 |  | 1.302 | 0.766 |  | 0.765 | 1.308 |  | 0.768 | 1.302 |  | 0.768 | 1.302 |  | 0.768 | | 1.302 |
| Hypertension | 0.899 | 1.112 |  | 0.898 | 1.113 |  | 1.113 | 0.896 |  | 1.116 | 0.902 |  | 0.901 | 1.110 |  | 0.900 | 1.112 |  | 0.900 | 1.112 |  | 0.901 | | 1.109 |
| Hyperlipemia | 0.925 | 1.081 |  | 0.925 | 1.081 |  | 1.081 | 0.924 |  | 1.082 | 0.927 |  | 0.927 | 1.078 |  | 0.927 | 1.078 |  | 0.926 | 1.080 |  | 0.927 | | 1.078 |
| Diabetes | 0.887 | 1.127 |  | 0.888 | 1.127 |  | 1.127 | 0.886 |  | 1.128 | 0.887 |  | 0.888 | 1.127 |  | 0.887 | 1.127 |  | 0.887 | 1.127 |  | 0.887 | | 1.128 |
| FLD | 0.896 | 1.116 |  | 0.896 | 1.116 |  | 1.116 | 0.896 |  | 1.116 | 0.889 |  | 0.891 | 1.123 |  | 0.894 | 1.119 |  | 0.895 | 1.117 |  | 0.893 | | 1.119 |

Abbreviation: TV, tolerance value; VIFs, variance inflation factors; BMI, body mass index; FLD, fatty liver disease; PLR, platelet-to-lymphocyte ratio; NLR, neutrophil-to-lymphocyte ratio; MLR, monocyte-to-lymphocyte ratio; NHR, ratio of neutrophil count to HDL level; MHR, ratio of monocyte count to HDL level; SII, platelet count multiplied by neutrophil-to-lymphocyte ratio; SIRI, monocyte count multiplied by neutrophil-to-lymphocyte ratio; AISI, neutrophil count multiplied by platelet count multiplied by monocyte-to-lymphocyte ratio.
